# Supplementary material for: Computational identification of functional introns: high positional conservation of introns that harbor RNA genes
Source: PubMed Central journal article supplement — Nucleic Acids Res. 2013 Apr 19;41(11):5604–13. doi: 10.1093/nar/gkt244 (PMC3675471; doi:10.1093/nar/gkt244), 2013-04-19
Supplement: supp_gkt244_nar-00126-n-2013-File007.pdf [file supp_gkt244_nar-00126-n-2013-File007.pdf]

**Supplementary figures to the paper: Computational identification of functional introns: high positional conservation of introns that harbor RNA genes**

**Michal Chorev, Liran Carmel**

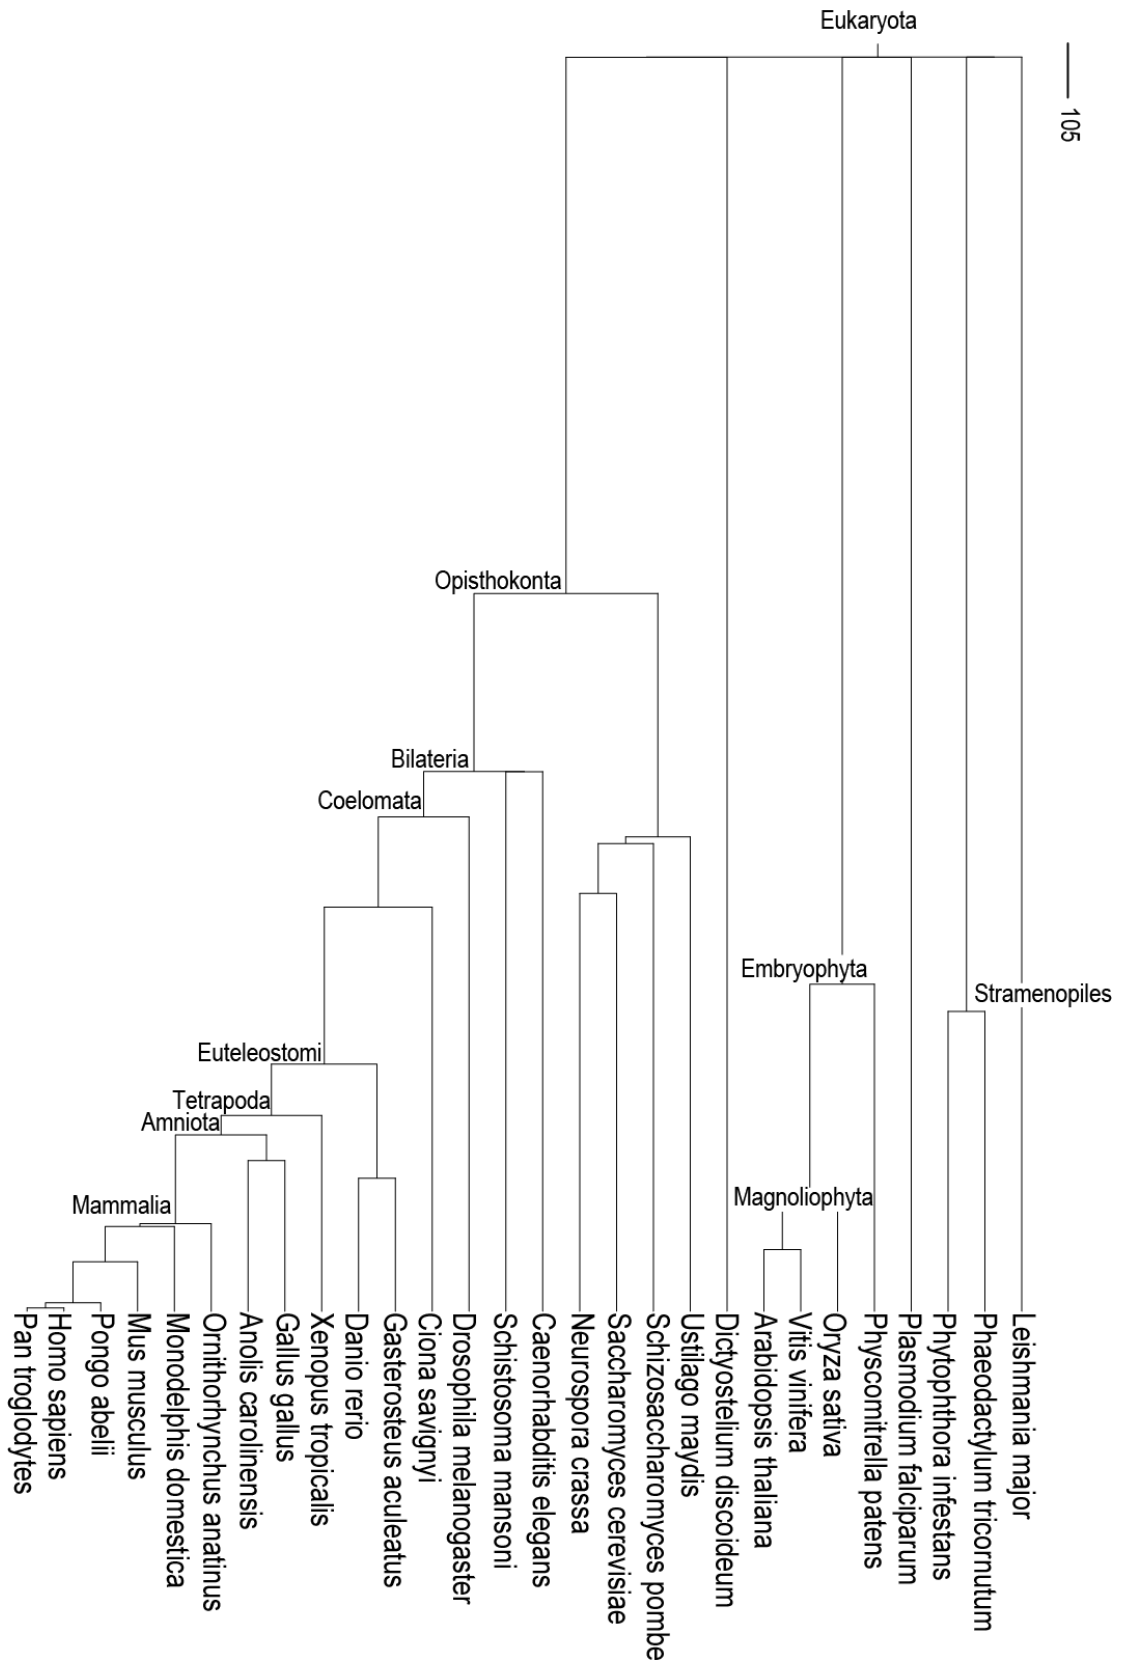

Figure S1. The phylogenetic tree of the final set of 28 species. Scale in million years.

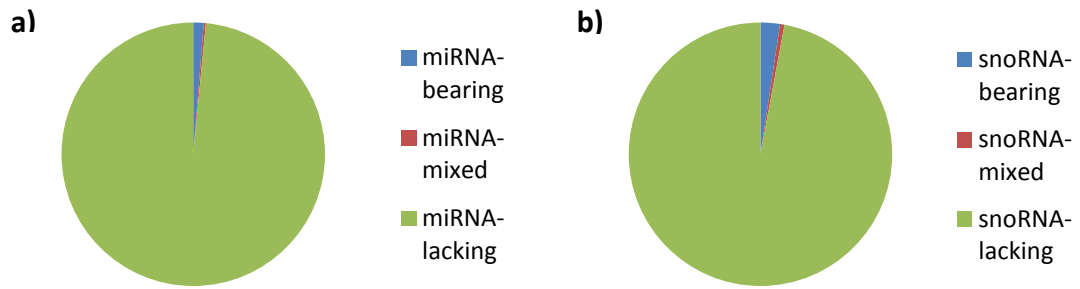

**Figure S2.** Division of all unique patterns. **a)** There are 53 miRNA-bearing, 11 miRNA-mixed and 4,099 miRNA-lacking unique patterns. **b)** There are 99 snoRNA-bearing, 23 snoRNA-mixed and 4,041 snoRNA-lacking unique patterns.
