# Supplementary material for: Computational identification of functional introns: high positional conservation of introns that harbor RNA genes
Source: PubMed Central journal article supplement — Nucleic Acids Res. 2013 Apr 19;41(11):5604–13. doi: 10.1093/nar/gkt244 (PMC3675471; doi:10.1093/nar/gkt244), 2013-04-19
Supplement: supp_gkt244_nar-00126-n-2013-File008.pdf [file supp_gkt244_nar-00126-n-2013-File008.pdf]

# Supplementary tables to the paper: Computational identification of functional introns: high positional conservation of introns that harbor RNA genes

Michal Chorev, Liran Carmel

| Species                        | Build      | Source         |
|--------------------------------|------------|----------------|
| <i>Acyrtosiphon pisum</i>      | assembly2  | AphidBase [1]  |
| <i>Aedes aegypti</i>           | AaegL1     | Ensembl [2]    |
| <i>Ailuropoda melanoleuca</i>  | ailMel1    | Ensembl [2]    |
| <i>Anolis carolinensis</i>     | anoCar1    | Ensembl [2]    |
| <i>Anopheles gambiae</i>       | anoGam1    | VectorBase [3] |
| <i>Apis mellifera</i>          | apiMel3    | Ensembl [2]    |
| <i>Aplysia californica</i>     | aplCal1    | Ensembl [2]    |
| <i>Arabidopsis thaliana</i>    | TAIR10     | Ensembl [2]    |
| <i>Aspergillus nidulans</i>    | ASM14920v1 | Ensembl [2]    |
| <i>Bombyx mori</i>             | v2.0       | SilkDB [4]     |
| <i>Bos Taurus</i>              | bosTau4    | Ensembl [2]    |
| <i>Branchiostoma floridae</i>  | braFlo1    | JGI [5]        |
| <i>Caenorhabditis brenneri</i> | caePb2     | UCSC [6]       |
| <i>Caenorhabditis briggsae</i> | cb3        | UCSC [6]       |
| <i>Caenorhabditis elegans</i>  | ce6        | UCSC [6]       |
| <i>Caenorhabditis japonica</i> | caeJap1    | UCSC [6]       |
| <i>Caenorhabditis remanei</i>  | caeRem3    | UCSC [6]       |
| <i>Callithrix jacchus</i>      | calJac3    | Ensembl [2]    |

|                                 |              |             |
|---------------------------------|--------------|-------------|
| <i>Canis familiaris</i>         | canFam2      | Ensembl [2] |
| <i>Cavia porcellus</i>          | cavPor3      | Ensembl [2] |
| <i>Choloepus hoffmanni</i>      | choHof1      | Ensembl [2] |
| <i>Ciona intestinalis</i>       | ci2          | UCSC [6]    |
| <i>Ciona savignyi</i>           | CSAV2.0      | Ensembl [2] |
| <i>Danio rerio</i>              | danRer6      | Ensembl [2] |
| <i>Daphnia pulex</i>            | Dappu1       | Ensembl [2] |
| <i>Dasypus novemcinctus</i>     | dasNov2      | Ensembl [2] |
| <i>Dictyostelium discoideum</i> | dictybase.01 | Ensembl [2] |
| <i>Dipodomys ordii</i>          | dipOrd1      | Ensembl [2] |
| <i>Drosophila ananassae</i>     | droAna3      | FlyBase [7] |
| <i>Drosophila erecta</i>        | droEre2      | FlyBase [7] |
| <i>Drosophila grimshawi</i>     | droGri2      | FlyBase [7] |
| <i>Drosophila melanogaster</i>  | dm3          | UCSC [6]    |
| <i>Drosophila mojavensis</i>    | droMoj3      | FlyBase [7] |
| <i>Drosophila persimilis</i>    | droPer1      | FlyBase [7] |
| <i>Drosophila pseudoobscura</i> | dp4          | UCSC [6]    |
| <i>Drosophila sechellia</i>     | droSec1      | FlyBase [7] |
| <i>Drosophila simulans</i>      | droSim1      | FlyBase [7] |
| <i>Drosophila virilis</i>       | droVir3      | FlyBase [7] |
| <i>Drosophila yakuba</i>        | droYak2      | FlyBase [7] |
| <i>Echinops telfairi</i>        | TENREC       | Ensembl [2] |
| <i>Equus caballus</i>           | equCab2      | Ensembl [2] |
| <i>Erinaceus europaeus</i>      | eriEur1      | Ensembl [2] |

|                                 |             |                 |
|---------------------------------|-------------|-----------------|
| <i>Felis catus</i>              | felCat3     | Ensembl [2]     |
| <i>Fugu rubripes</i>            | fr2         | UCSC [6]        |
| <i>Gallus gallus</i>            | galGal3     | Ensembl [2]     |
| <i>Gasterosteus aculeatus</i>   | gasAcu1     | Ensembl [2]     |
| <i>Giardia lamblia</i>          | 1.1         | Refseq [8]      |
| <i>Gorilla gorilla</i>          | gorGor3     | Ensembl [2]     |
| <i>Homo sapiens</i>             | hg19,GRCh37 | Ensembl [2]     |
| <i>Leishmania infantum</i>      | 1.1         | Ensembl [2]     |
| <i>Leishmania major</i>         | ASM272v2    | Ensembl [2]     |
| <i>Linepithema humile</i>       | 1.2         | Fourmidable [9] |
| <i>Loxodonta Africana</i>       | loxAfr3     | Ensembl [2]     |
| <i>Macropus eugenii</i>         | Meug_1.0    | Ensembl [2]     |
| <i>Microcebus murinus</i>       | micMur1     | Ensembl [2]     |
| <i>Monodelphis domestica</i>    | monDom5     | Ensembl [2]     |
| <i>Mus musculus</i>             | mm9         | Ensembl [2]     |
| <i>Myotis lucifugus</i>         | myoLuc1     | Ensembl [2]     |
| <i>Nematostella vectensis</i>   | Nemve1      | Ensembl [2]     |
| <i>Neurospora crassa</i>        | ASM18292v1  | Ensembl [2]     |
| <i>Ochotona princeps</i>        | OchPri2.0   | Ensembl [2]     |
| <i>Ornithorhynchus anatinus</i> | ornAna1     | Ensembl [2]     |
| <i>Oryctolagus cuniculus</i>    | oryCun2.0   | UCSC [6]        |
| <i>Oryza sativa</i>             | MSU6        | Ensembl [2]     |
| <i>Oryzias latipes</i>          | oryLat2     | Ensembl [2]     |
| <i>Otolemur garnettii</i>       | otoGar1     | Ensembl [2]     |

|                               |              |                         |
|-------------------------------|--------------|-------------------------|
| Pan troglodytes               | panTro2      | Ensembl [2]             |
| Petromyzon marinus            | petMar1      | Ensembl [2]             |
| Phaeodactylum tricornutum     | ASM15095v1   | Ensembl [2]             |
| Physcomitrella patens         | ASM242v1     | Ensembl [2]             |
| Phytophthora infestans        | ASM14294v1   | Ensembl [2]             |
| Plasmodium falciparum         | ASM276v1     | Ensembl [2]             |
| Pogonomymex barbatus          | 1.2          | Fourmidable [9]         |
| Pongo abelii                  | ponAbe2      | Ensembl [2]             |
| Pristionchus pacificus        | priPac1      | Ensembl [2]             |
| Procapra capensis             | proCap1      | Ensembl [2]             |
| Pteropus vampyrus             | pteVam1      | Ensembl [2]             |
| Puccinia graminis             | ASM14992v1   | Ensembl [2]             |
| Puccinia triticina            | ASM15152v1   | Ensembl [2]             |
| Rattus norvegicus             | rn4          | UCSC [6]                |
| Rhesus macaque                | rheMac2      | Ensembl [2]             |
| Saccharomyces cerevisiae      | sacCer2      | Ensembl [2]             |
| Schistosoma mansoni           | sma_v3.1     | Ensembl [2]             |
| Schizosaccharomyces pombe     | 1.1,ASM294v1 | Refseq [8], Ensembl [2] |
| Sorex araneus                 | sorAra1      | Ensembl [2]             |
| Spermophilus tridecemlineatus | speTri1      | Ensembl [2]             |
| Strongylocentrotus purpuratus | strPur2      | Ensembl [2]             |
| Sus scrofa                    | susScr2      | Ensembl [2]             |
| Taeniopygia guttata           | taeGut1      | Ensembl [2]             |
| Tetraodon nigroviridis        | tetNig2      | Ensembl [2]             |

|                      |            |                 |
|----------------------|------------|-----------------|
| Tribolium castaneum  | Tcas3.0    | BeetleBase [10] |
| Trichoplax adhaerens | ASM15027v1 | Ensembl [2]     |
| Tupaia belangeri     | tupBel1    | Ensembl [2]     |
| Tursiops truncatus   | turTru1    | Ensembl [2]     |
| Ustilago maydis      | UM1        | Ensembl [2]     |
| Vicugna pacos        | vicPac1    | Ensembl [2]     |
| Vitis vinifera       | IGGP_12x   | Ensembl [2]     |
| Xenopus tropicalis   | xenTro2    | Ensembl [2]     |

---

**Table S1.** List of annotated genomes taken into our initial data set.

| <b>Species</b>            | <b># orthologous groups</b> | <b>Fraction</b> |
|---------------------------|-----------------------------|-----------------|
| Physcomitrella patens     | 79                          | 0.18            |
| Plasmodium falciparum     | 108                         | 0.24            |
| Saccharomyces cerevisiae  | 121                         | 0.27            |
| Ustilago maydis           | 123                         | 0.27            |
| Schizosaccharomyces pombe | 133                         | 0.30            |
| Phaeodactylum tricornutum | 139                         | 0.31            |
| Neurospora crassa         | 140                         | 0.31            |
| Leishmania major          | 143                         | 0.32            |
| Arabidopsis thaliana      | 163                         | 0.36            |
| Oryza sativa              | 165                         | 0.37            |
| Vitis vinifera            | 167                         | 0.37            |
| Ciona savignyi            | 171                         | 0.38            |
| Dictyostelium discoideum  | 174                         | 0.39            |
| Phytophthora infestans    | 191                         | 0.42            |
| Caenorhabditis elegans    | 206                         | 0.46            |
| Schistosoma mansoni       | 213                         | 0.47            |
| Drosophila melanogaster   | 256                         | 0.57            |
| Xenopus tropicalis        | 336                         | 0.75            |
| Danio rerio               | 346                         | 0.77            |
| Ornithorhynchus anatinus  | 352                         | 0.78            |
| Gallus gallus             | 363                         | 0.81            |
| Anolis carolinensis       | 378                         | 0.84            |

|                        |     |      |
|------------------------|-----|------|
| Mus musculus           | 394 | 0.88 |
| Gasterosteus aculeatus | 402 | 0.89 |
| Monodelphis domestica  | 403 | 0.90 |
| Pan troglodytes        | 409 | 0.91 |
| Pongo abelii           | 427 | 0.95 |
| Homo sapiens           | 450 | 1.00 |

**Table S2.** A list of the final 28 species used in the analysis. For each species, we provide the number of orthologous groups in which it has a representative gene, and the fraction it makes out of the 450 groups that were analyzed.

|                | miRNA-bearing | miRNA-mixed | miRNA-lacking | total |
|----------------|---------------|-------------|---------------|-------|
| snoRNA-bearing | 3             | 0           | 96            | 99    |
| snoRNA-mixed   | 0             | 1           | 22            | 23    |
| snoRNA-lacking | 50            | 10          | 3,981         | 4,041 |
| <b>total</b>   | 53            | 11          | 4,099         | 4,163 |

**Table S3.** Overlaps between miRNA/snoRNA-bearing/mixed/lacking unique patterns.

| Feature                      | Depicting    | Description                                                                                                                                                                                                                                                                     |
|------------------------------|--------------|---------------------------------------------------------------------------------------------------------------------------------------------------------------------------------------------------------------------------------------------------------------------------------|
| log-likelihood (LOGLIKE)     | conservation | Given EREM's estimation of the evolutionary model parameters, this is the log-likelihood of observing the pattern, $\log l_p$ .                                                                                                                                                 |
| log number of times observed | typicality   | $\log n_p$ . Combined with $\log l_p$ , this gives, up to a multiplicative constant, the (log) ratio of the number of times we expect to observe that pattern in our data, divided by the actual observed number, $\log l_p - \log n_p = \log \left( \frac{l_p}{n_p} \right)$ . |
| binomial test                | typicality   | p-value of the binomial test (with                                                                                                                                                                                                                                              |

|                                                                                     |                         |                                                                                                                                                                      |
|-------------------------------------------------------------------------------------|-------------------------|----------------------------------------------------------------------------------------------------------------------------------------------------------------------|
|                                                                                     |                         | Bonferroni correction), measuring how likely it is to see the pattern $n_p$ times, given its likelihood is $l_p$ .                                                   |
| number of ones                                                                      | conservation, antiquity | The number of 1's in the pattern.                                                                                                                                    |
| fraction of ones<br>(ONES_RATIO_KNOWN)                                              | conservation, antiquity | The number of 1's divided by the total number of 1's and 0's in the pattern.                                                                                         |
| number of times<br>observed                                                         | typicality              | The number of occurrences of pattern $p$ , $n_p$ .                                                                                                                   |
| number of evolutionary<br>events (gain weight 3,<br>loss weight 1;<br>SANKOFF_G3L1) | conservation            | The minimum number of intron gain and loss events required to obtain the pattern, given that gains cost three times as much as losses (using the Sankoff algorithm). |
| number of evolutionary<br>events (gain weight 1,<br>loss weight 3;<br>SANKOFF_G1L3) | conservation            | The minimum number of intron gain and loss events required to obtain the pattern, given that losses cost three times as much as gains (using the Sankoff algorithm). |
| number of evolutionary<br>events (gain weight 1,<br>loss weight 1)                  | conservation            | The minimum number of intron gain and loss events required to obtain the pattern, given that losses cost as                                                          |

|                                     |                            |                                                                                                                                                                                      |
|-------------------------------------|----------------------------|--------------------------------------------------------------------------------------------------------------------------------------------------------------------------------------|
|                                     |                            | much as gains (using the Fitch algorithm).                                                                                                                                           |
| one in amphibians<br>(IN_AMPHIBIAN) | conservation,<br>antiquity | This feature is 1 if the pattern has a 1 in at least one amphibian ( <i>A. carolinensis</i> or <i>X. tropicalis</i> ), otherwise it is 0.                                            |
| one in fish (IN_FISH)               | conservation,<br>antiquity | This feature is 1 if the pattern has a 1 in at least one fish ( <i>D. rerio</i> or <i>G. aculeatus</i> ), otherwise it is 0.                                                         |
| one in birds (IN_BIRD)              | conservation,<br>antiquity | This feature is 1 if the pattern has a 1 in <i>G. gallus</i> otherwise it is 0.                                                                                                      |
| one in fungi (IN_FUNGI)             | conservation,<br>antiquity | This feature is 1 if the pattern has a 1 in at least one fungi ( <i>U. maydis</i> , <i>S. pombe</i> , <i>S. cerevisiae</i> , or <i>N. crassa</i> ), otherwise it is 0.               |
| one in plants<br>(IN_PLANT)         | conservation,<br>antiquity | This feature is 1 if the pattern has a 1 in at least one plant ( <i>V. vinifera</i> , <i>A. thaliana</i> , <i>P. patens</i> , or <i>O. sativa</i> ), otherwise it is 0.              |
| one in protists<br>(IN_PROTIST)     | conservation,<br>antiquity | This feature is 1 if the pattern has a 1 in at least one protist ( <i>P. falciparum</i> , <i>D. discoideum</i> , <i>L. major</i> , <i>P. tricornutum</i> , or <i>P. infestans</i> ), |



|                             |                            |                                                                                          |
|-----------------------------|----------------------------|------------------------------------------------------------------------------------------|
|                             |                            | otherwise it is 0.                                                                       |
| one in <i>U. maydis</i>     | conservation,<br>antiquity | This feature is 1 if the pattern has a<br>1 in <i>U. maydis</i> , otherwise it is 0.     |
| one in <i>S. pombe</i>      | conservation,<br>antiquity | This feature is 1 if the pattern has a<br>1 in <i>S. pombe</i> , otherwise it is 0.      |
| one in <i>S. cerevisiae</i> | conservation,<br>antiquity | This feature is 1 if the pattern has a<br>1 in <i>S. cerevisiae</i> , otherwise it is 0. |
| one in <i>N. crassa</i>     | conservation,<br>antiquity | This feature is 1 if the pattern has a<br>1 in <i>N. crassa</i> , otherwise it is 0.     |
| one in <i>V. vinifera</i>   | conservation,<br>antiquity | This feature is 1 if the pattern has a<br>1 in <i>V. vinifera</i> , otherwise it is 0.   |
| one in <i>A. thaliana</i>   | conservation,<br>antiquity | This feature is 1 if the pattern has a<br>1 in <i>A. thaliana</i> , otherwise it is 0.   |
| one in <i>P. patens</i>     | conservation,<br>antiquity | This feature is 1 if the pattern has a<br>1 in <i>P. patens</i> , otherwise it is 0.     |
| one in <i>O. sativa</i>     | conservation,<br>antiquity | This feature is 1 if the pattern has a<br>1 in <i>O. sativa</i> , otherwise it is 0.     |
| one in <i>P. falciparum</i> | conservation,<br>antiquity | This feature is 1 if the pattern has a<br>1 in <i>P. falciparum</i> , otherwise it is 0. |
| one in <i>D. discoideum</i> | conservation,<br>antiquity | This feature is 1 if the pattern has a<br>1 in <i>D. discoideum</i> , otherwise it is 0. |
| one in <i>L. major</i>      | conservation,<br>antiquity | This feature is 1 if the pattern has a<br>1 in <i>L. major</i> , otherwise it is 0.      |

---

|                               |                            |                                                                                            |
|-------------------------------|----------------------------|--------------------------------------------------------------------------------------------|
| one in <i>P. tricornutum</i>  | conservation,<br>antiquity | This feature is 1 if the pattern has a<br>1 in <i>P. tricornutum</i> , otherwise it is 0.  |
| one in <i>P. infestans</i>    | conservation,<br>antiquity | This feature is 1 if the pattern has a<br>1 in <i>P. infestans</i> , otherwise it is 0.    |
| one in <i>C. elegans</i>      | conservation,<br>antiquity | This feature is 1 if the pattern has a<br>1 in <i>C. elegans</i> , otherwise it is 0.      |
| one in <i>C. savignyi</i>     | conservation,<br>antiquity | This feature is 1 if the pattern has a<br>1 in <i>C. savignyi</i> , otherwise it is 0.     |
| one in <i>S. mansoni</i>      | conservation,<br>antiquity | This feature is 1 if the pattern has a<br>1 in <i>S. mansoni</i> , otherwise it is 0.      |
| one in <i>G. aculeatus</i>    | conservation,<br>antiquity | This feature is 1 if the pattern has a<br>1 in <i>G. aculeatus</i> , otherwise it is 0.    |
| one in <i>H. sapiens</i>      | conservation,<br>antiquity | This feature is 1 if the pattern has a<br>1 in <i>H. sapiens</i> , otherwise it is 0.      |
| one in <i>A. carolinensis</i> | conservation,<br>antiquity | This feature is 1 if the pattern has a<br>1 in <i>A. carolinensis</i> , otherwise it is 0. |
| one in <i>P. troglodytes</i>  | conservation,<br>antiquity | This feature is 1 if the pattern has a<br>1 in <i>P. troglodytes</i> , otherwise it is 0.  |
| one in <i>P. abelii</i>       | conservation,<br>antiquity | This feature is 1 if the pattern has a<br>1 in <i>P. abelii</i> , otherwise it is 0.       |
| one in <i>M. domestica</i>    | conservation,<br>antiquity | This feature is 1 if the pattern has a<br>1 in <i>M. domestica</i> , otherwise it is 0.    |
| one in <i>M. musculus</i>     | conservation,              | This feature is 1 if the pattern has a                                                     |

---

|                                     |                            |                                                                                                                                                                                                                                                                                          |
|-------------------------------------|----------------------------|------------------------------------------------------------------------------------------------------------------------------------------------------------------------------------------------------------------------------------------------------------------------------------------|
|                                     | antiquity                  | 1 in <i>M. musculus</i> , otherwise it is 0.                                                                                                                                                                                                                                             |
| one in <i>D. melanogaster</i>       | conservation,<br>antiquity | This feature is 1 if the pattern has a<br>1 in <i>D. melanogaster</i> , otherwise it is<br>0.                                                                                                                                                                                            |
| one in <i>D. rerio</i>              | conservation,<br>antiquity | This feature is 1 if the pattern has a<br>1 in <i>D. rerio</i> , otherwise it is 0.                                                                                                                                                                                                      |
| one in <i>X. tropicalis</i>         | conservation,<br>antiquity | This feature is 1 if the pattern has a<br>1 in <i>X. tropicalis</i> , otherwise it is 0.                                                                                                                                                                                                 |
| intron density under<br>LCA         | conservation,<br>antiquity | The last common ancestor (LCA) of<br>all the intron-bearing species is<br>assumed to be the species in which<br>the intron was originated.<br><br>LCA_LEAVES_RATIO is the ratio of<br>intron-bearing (1's) to intron-lacking<br>(0's) species, from among all the<br>descendants of LCA. |
| taxonomic level of<br>intron origin | antiquity                  | The number of ancestor nodes<br>separating the LCA above from the<br>tree root.                                                                                                                                                                                                          |
| age of intron origin<br>(LCA_AGE)   | antiquity                  | The age of LCA above [MYA].                                                                                                                                                                                                                                                              |
| mean relative intron<br>position    | position                   | The mean distance of the exon-exon<br>junction from the beginning of the                                                                                                                                                                                                                 |

|                                                    |          |                                                                                                    |
|----------------------------------------------------|----------|----------------------------------------------------------------------------------------------------|
|                                                    |          | coding sequence (CDS) divided by the CDS length.                                                   |
| median relative intron position (MED_REL_POSITION) | position | The median distance of the exon-exon junction from the beginning of the CDS divided by CDS length. |
| mean intron position                               | position | The mean distance of the exon-exon junction from the beginning of the CDS [nucleotides].           |
| median intron position (MED_POSITION)              | position | The median distance of the exon-exon junction from the beginning of the CDS [nucleotides].         |

**Table S4.** The initial set of 48 pattern-characterizing features. Abbreviated names are provided for the 13 features that were used in the final analysis. For each pattern, we note what aspect of the pattern it describes.

| RNA gene | Mean             |                  |                      | median           |                  |                      |
|----------|------------------|------------------|----------------------|------------------|------------------|----------------------|
|          | -bearing pattern | -lacking pattern | p-value (t-test)     | -bearing pattern | -lacking pattern | p-value (U-test)     |
| miRNA    | 690.99           | 400.37           | $7.6 \cdot 10^{-4}$  | 454.9            | 184              | $8.8 \cdot 10^{-9}$  |
| snoRNA   | 840.18           | 392.52           | $4.7 \cdot 10^{-16}$ | 744              | 184              | $9.4 \cdot 10^{-22}$ |

**Table S5.** The results when LCA\_AGE was calculated by EREM instead of by using the Dollo parsimony. Mean and median for both miRNA and snoRNA -bearing and -lacking unique patterns. P-values are Bonferroni-corrected.

## References

1. Legeai, F., et al., *AphidBase: a centralized bioinformatic resource for annotation of the pea aphid genome*. *Insect Mol Biol*, 2010. **19 Suppl 2**: p. 5-12.
2. Flicek, P., et al., *Ensembl 2012*. *Nucleic Acids Res*, 2012. **40**(Database issue): p. D84-90.
3. Lawson, D., et al., *VectorBase: a data resource for invertebrate vector genomics*. *Nucleic Acids Res*, 2009. **37**(Database issue): p. D583-7.
4. Duan, J., et al., *SilkDB v2.0: a platform for silkworm (Bombyx mori ) genome biology*. *Nucleic Acids Res*, 2010. **38**(Database issue): p. D453-6.
5. Grigoriev, I.V., et al., *The genome portal of the Department of Energy Joint Genome Institute*. *Nucleic Acids Res*, 2012. **40**(Database issue): p. D26-32.
6. Rhead, B., et al., *The UCSC Genome Browser database: update 2010*. *Nucleic Acids Res*, 2010. **38**(Database issue): p. D613-9.
7. McQuilton, P., S.E. St Pierre, and J. Thurmond, *FlyBase 101--the basics of navigating FlyBase*. *Nucleic Acids Res*, 2012. **40**(Database issue): p. D706-14.
8. Pruitt, K.D., T. Tatusova, and D.R. Maglott, *NCBI reference sequences (RefSeq): a curated non-redundant sequence database of genomes, transcripts and proteins*. *Nucleic Acids Res*, 2007. **35**(Database issue): p. D61-5.
9. Wurm, Y., et al., *Fourmidable: a database for ant genomics*. *BMC Genomics*, 2009. **10**: p. 5.
10. Kim, H.S., et al., *BeetleBase in 2010: revisions to provide comprehensive genomic information for Tribolium castaneum*. *Nucleic Acids Res*, 2010. **38**(Database issue): p. D437-42.
